# Supplementary material
Source: PubMed Central journal article supplement (PMC7657238)
Supplement: CAS-104-558-s001.pdf [file CAS-104-558-s001.pdf]

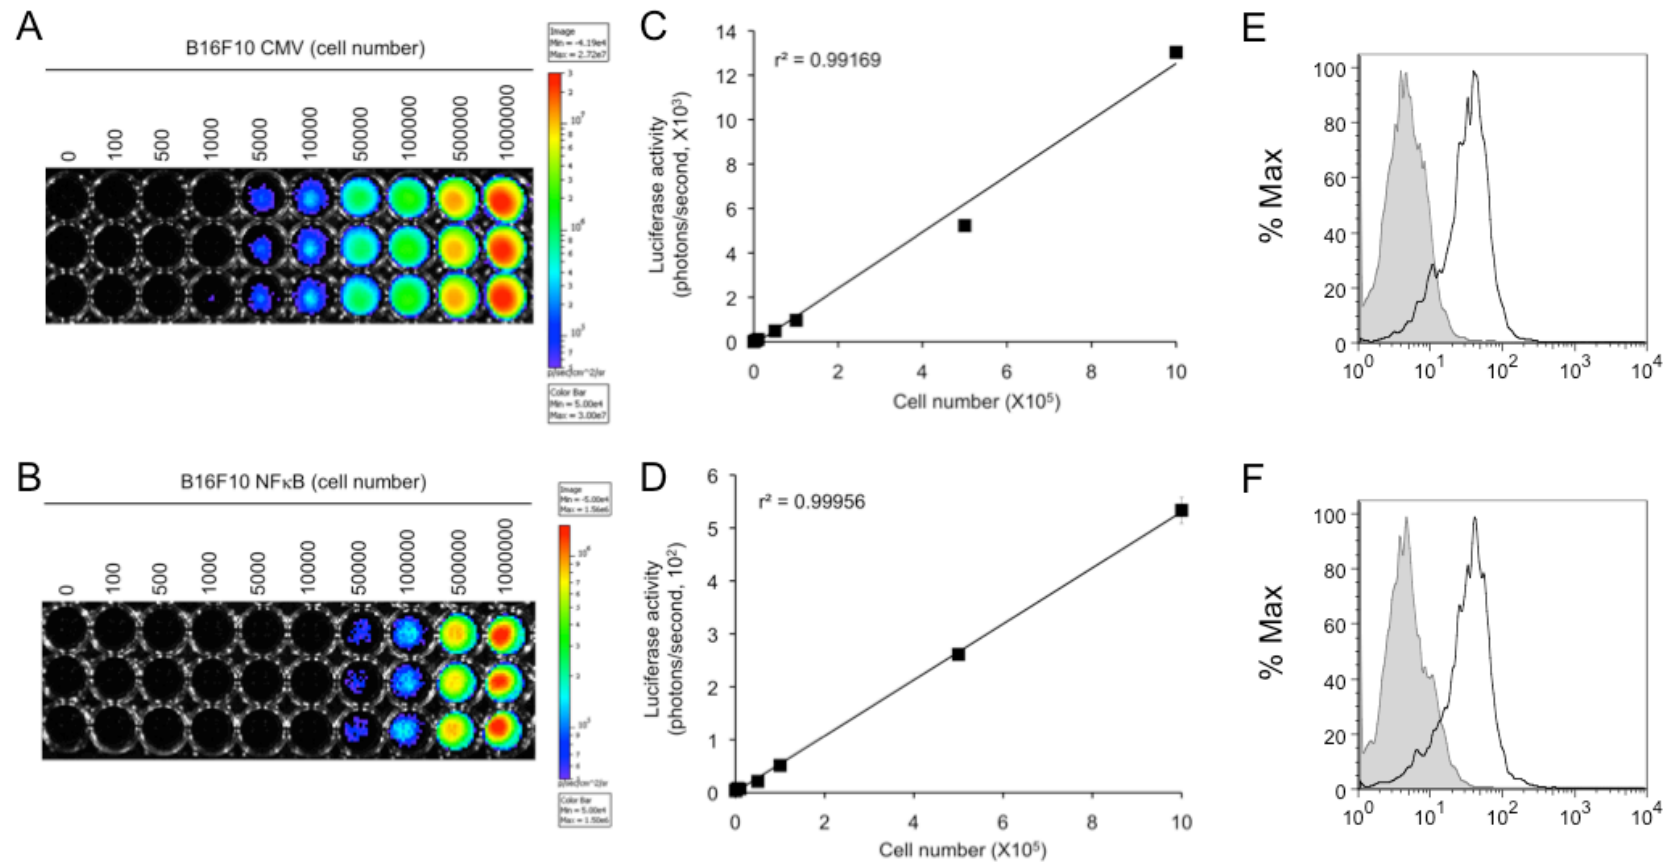

**Figure S1. Establishment of B16F10 CMV and B16F10 NFκB cells.**

B16F10 transfectant cells (B16F10 NFκB or B16F10 CMV) were plated at the indicated cell number and luminescent images of B16F10 CMV (A) cells and B16F10 NFκB (B) cells are shown. The graphs are plotted luminescence (photons/second) against cell number of B16F10 CMV (C) cells and B16F10 NFκB (D) cells, and the linear correlation of the plots were shown as  $r^2$ . Error bars represent the standard error of mean (SEM). The expression of DR5 on B16F10 CMV (E) or B16F10 NFκB (F) were shown (filled: isotype control, open: anti-DR5).

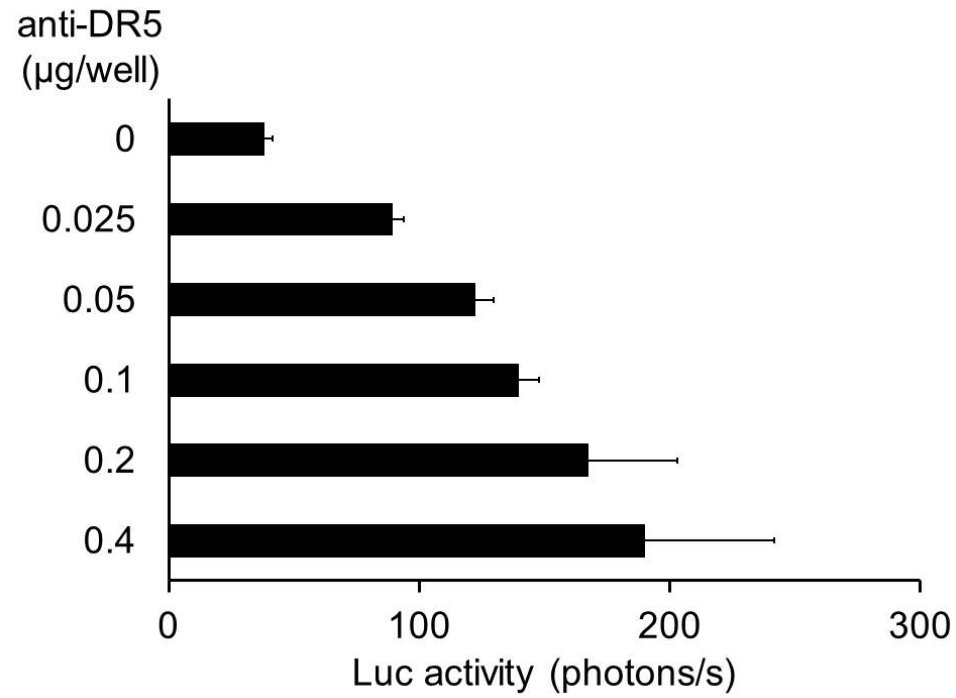

**Figure S2. NFκB activation by DR5 stimulation in B16F10.**

B16F10 NFκB cells were plated with or without agonistic anti-DR5 at indicated concentration in the presence of cross-linker (protein A-beads) and luminescence (photons/second) were measured. Error bars represent the standard error of mean (SEM).
